# Supplementary material for: Wattles in goats are associated with the FMN1/GREM1 region on chromosome 10
Source: PubMed Central journal article supplement — Anim Genet. 2015 Mar 3;46(3):316–20. doi: 10.1111/age.12279 (PMC5024000; doi:10.1111/age.12279), 2015-03-03
Supplement: AGE-46-316-s001.pdf [file AGE-46-316-s001.pdf]

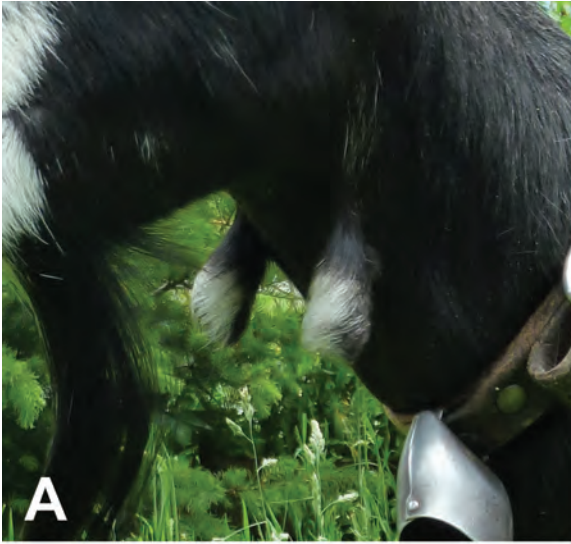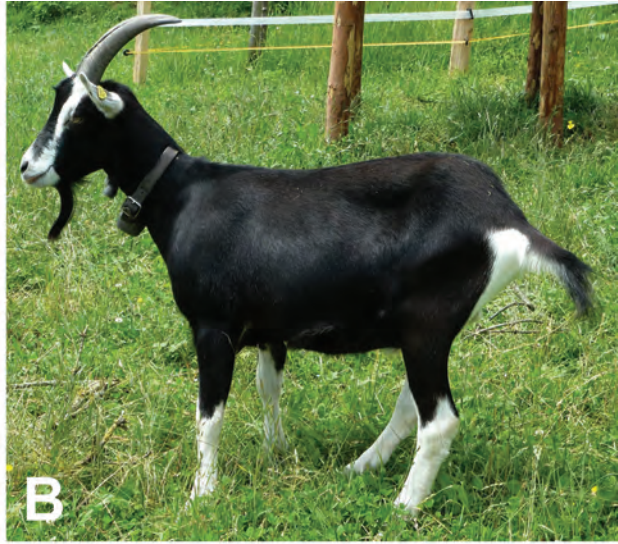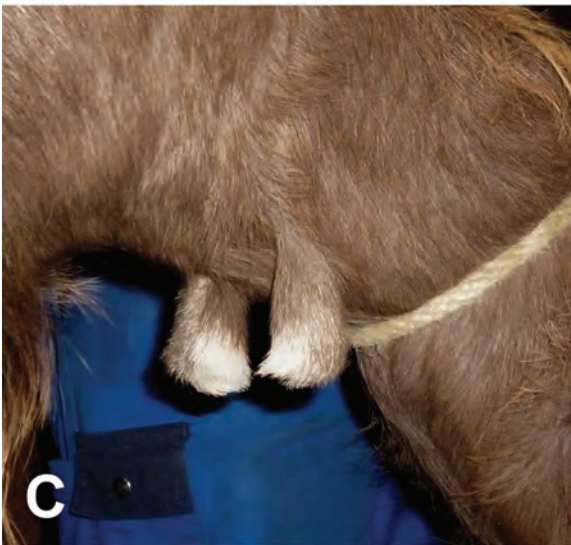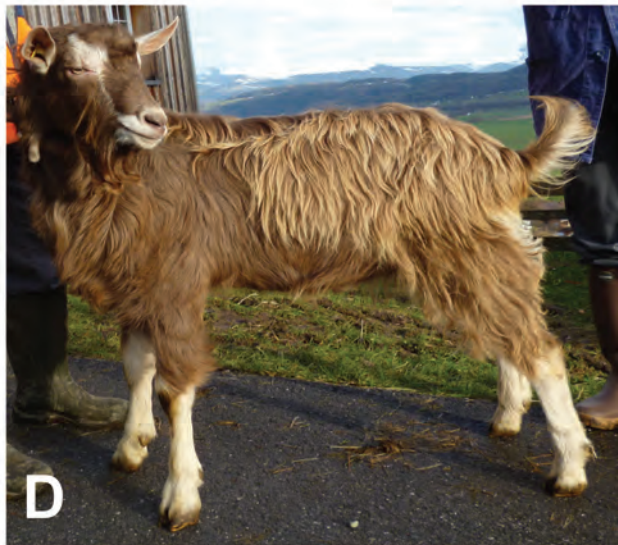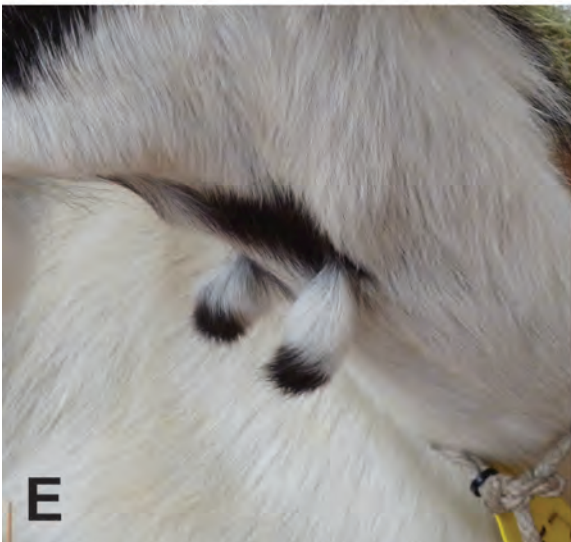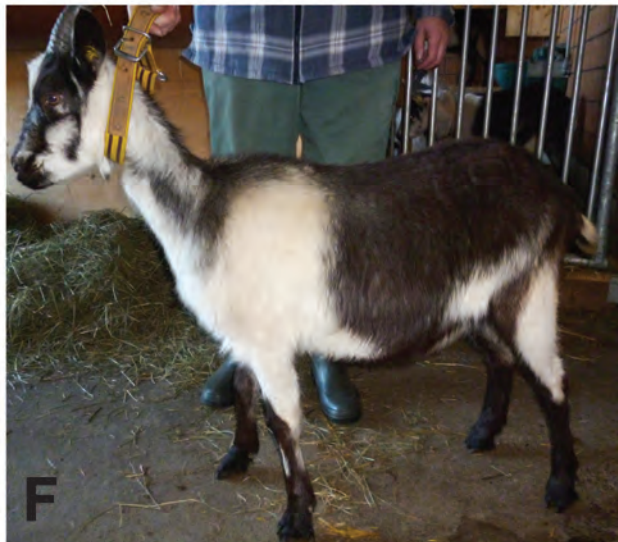

**Figure S1.**  
**Identical coat color patterning of the wattles and limbs in different goat breeds.**  
Three examples of individuals showing wattles in Grison striped goats (A,B), Toggenburger goats (C,D), and Peacock goats (E,F).
