# Supplementary material for: Wattles in goats are associated with the FMN1/GREM1 region on chromosome 10
Source: PubMed Central journal article supplement — Anim Genet. 2015 Mar 3;46(3):316–20. doi: 10.1111/age.12279 (PMC5024000; doi:10.1111/age.12279), 2015-03-03
Supplement: AGE-46-316-s002.pdf [file AGE-46-316-s002.pdf]

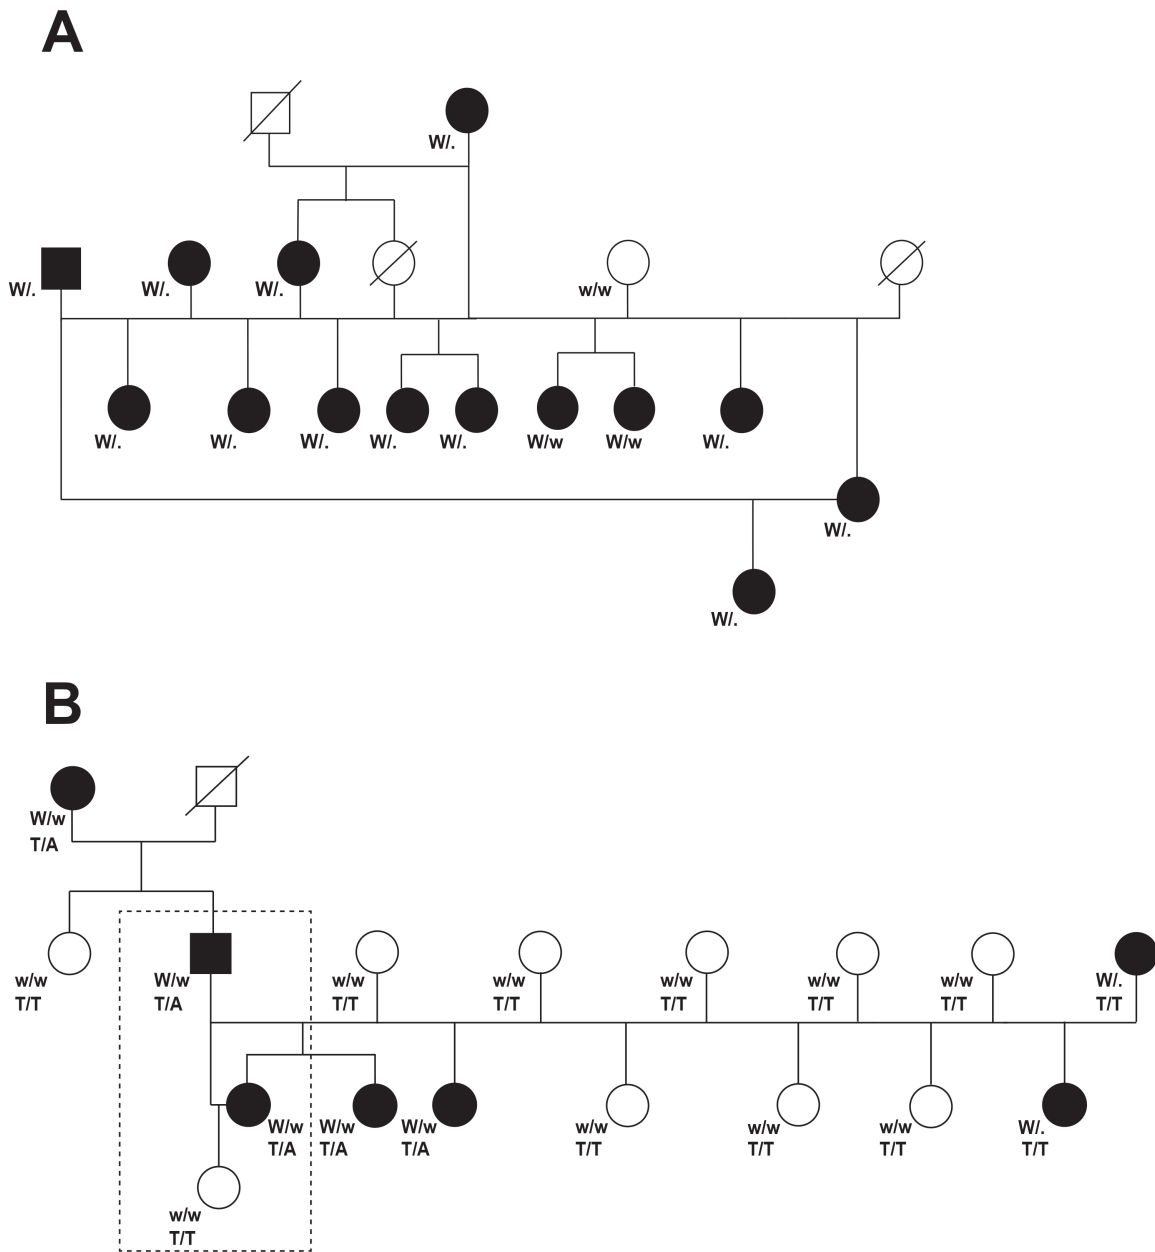

**Figure S2.**

**Pedigree of two goat families showing the autosomal dominant inheritance of the wattles (W).**

Males are represented by squares, females by circles. Affected animals (goats with wattles) are shown with fully black symbols. Animals without phenotype information are indicated with skewed line.

The genotypes at the W locus are displayed below: Goats showing no wattles are assigned as w/w and goats with wattles are assigned either as W/., if the exact genotype was unknown or as W/w if they were obligate heterozygous for the W mutation. (A) A family of Grison striped goats. (B) A family of Saanen goats, where the dashed line-box highlights the family trio that used for the whole genome sequencing.

For that family the genotypes of the *FMN1* c.2076T>A SNP are displayed below the assumed W genotypes.
