# Supplementary material for: Wattles in goats are associated with the FMN1/GREM1 region on chromosome 10
Source: PubMed Central journal article supplement — Anim Genet. 2015 Mar 3;46(3):316–20. doi: 10.1111/age.12279 (PMC5024000; doi:10.1111/age.12279), 2015-03-03
Supplement: AGE-46-316-s003.pdf [file AGE-46-316-s003.pdf]

**Table S1. Number of animals from nine Swiss goat breeds with and without wattles used in this study.**

| <b>breed</b>          | <b>cases (with wattles)</b> |            |              | <b>controls (no wattles)</b> |              |
|-----------------------|-----------------------------|------------|--------------|------------------------------|--------------|
|                       | <b>(number of wattles)</b>  |            |              |                              |              |
|                       | <b>1</b>                    | <b>2</b>   | <b>total</b> |                              | <b>total</b> |
| Appenzell goat        |                             | 12         | 12           | 7                            | 19           |
| Black Verzsaca goat   | 2                           | 16         | 18           | 11                           | 29           |
| Chamois colored goat  | 4                           | 39         | 43           | 40                           | 83           |
| Grey goat             |                             | 12         | 12           | 12                           | 24           |
| Grison striped goat   | 2                           | 18         | 20           | 22                           | 42           |
| Peacock goat          | 1                           | 11         | 12           | 13                           | 25           |
| Saanen goat           | 3                           | 29         | 32           | 39                           | 71           |
| St Gallen Booted goat |                             | 12         | 12           | 12                           | 24           |
| Toggenburger goat     | 1                           | 12         | 13           | 11                           | 24           |
| <b>Total</b>          | <b>13</b>                   | <b>161</b> | <b>174</b>   | <b>167</b>                   | <b>341</b>   |
