# Supplementary material for: Wattles in goats are associated with the FMN1/GREM1 region on chromosome 10
Source: PubMed Central journal article supplement — Anim Genet. 2015 Mar 3;46(3):316–20. doi: 10.1111/age.12279 (PMC5024000; doi:10.1111/age.12279), 2015-03-03
Supplement: AGE-46-316-s004.pdf [file AGE-46-316-s004.pdf]

**Table S2. Two best associated SNPs of the genome-wide association study (GWAS).**

The corresponding allele frequencies and genotype distribution in goats with (W/. genotype) and without wattles (w/w genotype) is shown (0: reference allele; 1: variant allele).

| SNP                          | CHIR 10 position | Allele frequencies (%) |      |      |      | P-value                | Genotype distribution (n) |     |     |       |       |     |     |       |
|------------------------------|------------------|------------------------|------|------|------|------------------------|---------------------------|-----|-----|-------|-------|-----|-----|-------|
|                              |                  | w/w                    |      | W/.  |      |                        | w/w                       |     | W/. |       | total |     |     |       |
|                              |                  | 0                      | 1    | 0    | 1    |                        | 0/0                       | 0/1 | 1/1 | total | 0/0   | 0/1 | 1/1 | total |
| SNP31048-SCAFFOLD343-1829065 | g.26,397,973T>C  | 0.49                   | 0.51 | 0.73 | 0.27 | $8.90 \times 10^{-09}$ | 37                        | 91  | 39  | 167   | 91    | 72  | 11  | 174   |
| SNP31044-SCAFFOLD343-1700935 | g.26,526,103T>C  | 0.98                   | 0.02 | 0.88 | 0.12 | $5.22 \times 10^{-07}$ | 160                       | 6   | 0   | 166   | 135   | 34  | 3   | 172   |
