# Supplementary material for: Wattles in goats are associated with the FMN1/GREM1 region on chromosome 10
Source: PubMed Central journal article supplement — Anim Genet. 2015 Mar 3;46(3):316–20. doi: 10.1111/age.12279 (PMC5024000; doi:10.1111/age.12279), 2015-03-03
Supplement: AGE-46-316-s006.pdf [file AGE-46-316-s006.pdf]

**Table S4. Coding *FMN1* variants in the associated CHIR 10 region.**

Genotypes of the three sequenced family members and a variable number of genotyped controls are displayed (0: reference allele; 1: variant allele).

| CHIR10          | <i>FMN1</i>       | Effect                       | Family trio |        |        | Unrelated controls    |     |     |                    |     |     |
|-----------------|-------------------|------------------------------|-------------|--------|--------|-----------------------|-----|-----|--------------------|-----|-----|
|                 |                   |                              | w/w         | W/w    | W/w    | w/w (without wattles) |     |     | W/. (with wattles) |     |     |
|                 |                   |                              | child       | father | mother | 0/0                   | 0/1 | 1/1 | 0/0                | 0/1 | 1/1 |
| g.25,952,169A>G | exon 2: c.1980A>G | synonymous                   | 1/1         | 0/1    | 0/1    | 48                    | 29  | 24  |                    | 1   | 2   |
| g.25,973,006T>A | exon 3: c.2076T>A | non-synonymous (p.Asp692Glu) | 0/0         | 0/1    | 0/1    | 126                   |     |     | 65                 | 9   |     |
| g.26,072,689G>A | exon 7: c.4491G>A | synonymous                   | 1/1         | 0/1    | 0/1    | 48                    | 17  | 36  | 2                  | 1   |     |
